# Supplementary material
Source: publisher site journal article supplement (https://www.dovepress.com/get_supplementary_file.php?f=284513.docx)
Supplement: Supplementary file 1 [file get_supplementary_file.php]

**Supplementary Table S1: Questions for household’s food insecurity (HFIAS)**

| NO | QUESTION | RESPONSE OPTIONS |
| --- | --- | --- |
| 1. | In the past four weeks, did you worry that your household would not have enough food? | 0 = No (skip to Q2) 1=Yes |
| 1.a | How often did this happen? | 1 = Rarely (once or twice in the past four weeks)  2 = Sometimes (three to ten times in the past four weeks)  3 = Often (more than ten times in the past four weeks) |
| 2. | In the past four weeks, were you or any household member not able to eat the kinds of foods you preferred because of a lack  of resources? | 0 = No (skip to Q3) 1=Yes |
| 2.a | How often did this happen? | 1 = Rarely (once or twice in the past four weeks)  2 = Sometimes (three to ten times in the past four weeks)  3 = Often (more than ten times in the past four weeks) |
| 3. | In the past four weeks, did you or any household member have to eat a limited variety of foods  due to a lack of resources? | 0 = No (skip to Q4) 1 = Yes |
| 3.a | How often did this happen? | 1 = Rarely (once or twice in the past four weeks)  2 = Sometimes (three to ten times in the past four weeks)  3 = Often (more than ten times in the past four weeks) |
| 4. | In the past four weeks, did you or any household member have to eat some foods that you really did  not want to eat because of a lack of resources to | 0 = No (skip to Q5) 1 = Yes |
|  | obtain other types of food? |  |
| 4.a | How often did this happen? | 1 = Rarely (once or twice in the past four weeks)  2 = Sometimes (three to ten times in the past four weeks)  3 = Often (more than ten times in the past four weeks) |
| 5. | In the past four weeks, did you or any household member have to eat a smaller meal than you felt you needed because there  was not enough food? | 0 = No (skip to Q6) 1 = Yes |
| 5.a | How often did this happen? | 1 = Rarely (once or twice in the past four weeks)  2 = Sometimes (three to ten times in the past four weeks)  3 = Often (more than ten times in the past four weeks) |
| 6. | In the past four weeks, did you or any other household member have to eat fewer meals in a day because  there was not enough food? | 0 = No (skip to Q7) 1 = Yes |
| 6.a | How often did this happen? | 1 = Rarely (once or twice in the past four weeks)  2 = Sometimes (three to ten times in the past four weeks)  3 = Often (more than ten times in the past four weeks) |
| 7. | In the past four weeks, was there ever no food to eat of any kind in your household because of lack of  resources to get food? | 0 = No (skip to Q8) 1 = Yes |
| 7.a | How often did this happen? | 1 = Rarely (once or twice in the past four weeks)  2 = Sometimes (three to ten times in the past four weeks)  3 = Often (more than ten times in the past four weeks) |

| 8. | In the past four weeks, did you or any household member go to sleep at night hungry because there was not enough food? | 0 = No (skip to Q9) 1 = Yes |
| --- | --- | --- |
| 8.a | How often did this happen? | 1 = Rarely (once or twice in the past four weeks)  2 = Sometimes (three to ten times in the past four weeks)  3 = Often (more than ten times in the past four weeks) |
| 9. | In the past four weeks, did you or any household member go a whole day and night without eating anything because there was  not enough food? | 0 = No (questionnaire is finished) 1 = Yes |
| 9.a | How often did this happen? | 1 = Rarely (once or twice in the past four weeks)  2 = Sometimes (three to ten times in the past four weeks)  3 = Often (more than ten times in the past four weeks) |

**Outcome variable HFIAS scores were categorized as:**

**HFIA category = 1** if [(Q1a=0 or Q1a=1) and ‘0 for questions 2 to 9’

**HFIA category = 2** if [(Q1a=2 or Q1a=3 or Q2a=1 or Q2a=2 or Q2a=3 or Q3a=1 or Q4a=1) and ‘0 for questions 5 to 9’

**HFIA category = 3** if [(Q3a=2 or Q3a=3 or Q4a=2 or Q4a=3 or Q5a=1 or Q5a=2 or Q6a=1 or Q6a=2) and ‘0 for questions 7 to 9’

**HFIA category = 4** if [Q5a=3 or Q6a=3 or Q7a=1 or Q7a=2 or Q7a=3 or Q8a=1 or Q8a=2 or Q8a=3 or Q9a=1 or Q9a=2 or Q9a=3]

**Four categories of household food insecurity:**

1. Food secure households : experience no food insecurity but could be rarely worried)
2. Mildly food insecure : households sometimes or often worry about food insecurity , and/or unable to eat preferred foods and/or have a monotonous diet- however these all conditions may not be very severe such as going bed hungry, not eating anything in 24 hours or running out of food
3. Moderately food insecure : have a monotonous diet or not preferred meals often however does not experience 3 severe conditions
4. Severely food insecure : May experience any of the three worst conditions such as going to bed hungry, having not eaten any food for the whole day and night or running short of food , and/or cutting meal size very frequently
